# Supplementary material for: Efficacy and Safety of Fecal Microbiota Transplantation in Treatment of Clostridioides difficile Infection among Pediatric Patients: A Systematic Review and Meta-Analysis
Source: Microorganisms. 2022 Dec 12;10(12):2450. doi: 10.3390/microorganisms10122450 (PMC9781859; doi:10.3390/microorganisms10122450)
Supplement: Supplementary file 1 [file microorganisms-10-02450-s001.zip › microorganisms-2056541-supplementary.pdf]

**Supplemental Table S1: Search terms used to identify and filter studies from literature**

|                    |                                                                                                                                                                                                                                                                                                                                                                                                                                                                                                                                                                                                                                                                                                                                                                                                                |
|--------------------|----------------------------------------------------------------------------------------------------------------------------------------------------------------------------------------------------------------------------------------------------------------------------------------------------------------------------------------------------------------------------------------------------------------------------------------------------------------------------------------------------------------------------------------------------------------------------------------------------------------------------------------------------------------------------------------------------------------------------------------------------------------------------------------------------------------|
| Keywords           | Pediatrics, <i>Clostridioides difficile</i> infection, FMT                                                                                                                                                                                                                                                                                                                                                                                                                                                                                                                                                                                                                                                                                                                                                     |
| Inclusion Criteria | <ul style="list-style-type: none"> <li>• Age <math>\leq</math> 21 yo</li> <li>• Diagnosis of CDI, or rCDI (recurrent CDI and/or refractory CDI)</li> <li>• FMT administered for CDI</li> <li>• Reporting of patient data and outcomes after first fecal infusion</li> <li>• Minimum follow-up of 8 weeks</li> <li>• At least moderate quality of evidence - as determined by RoB 2 (Revised Cochrane risk-of-bias assessment tool) and NIH assessment or NOS (Newcastle-Ottawa Scale)</li> <li>• At least 5 patients</li> </ul>                                                                                                                                                                                                                                                                                |
| Exclusion Criteria | <ul style="list-style-type: none"> <li>• FMT not administered</li> <li>• Less than 5 patients</li> <li>• Animal studies</li> <li>• Review articles</li> <li>• Systematic review and meta analyses</li> <li>• Lack of patient data</li> </ul>                                                                                                                                                                                                                                                                                                                                                                                                                                                                                                                                                                   |
| PubMed Search      | <p>Concept 1: "Fecal Microbiota Transplantation"[MeSH] OR "fecal microbiota transplantation"[tiab] OR "faecal microbiota transplantation"[tiab] OR "fecal microbiota transplant"[tiab] OR "faecal microbiota transplant"[tiab] OR "fecal microbiota transfer"[tiab] OR "faecal microbiota transfer"[tiab] OR "fecal transplant"[tiab] OR "faecal transplant"[tiab] OR "fecal transfer"[tiab] OR "faecal transfer"[tiab] OR "donor feces"[tiab] OR "donor faeces"[tiab] OR "donor stool"[tiab] OR "bacteriotherapy"[tiab] OR "FMT"[tiab]</p> <p>AND</p> <p>Concept 2: "Child"[Mesh] OR "child*"[tiab] OR "adolescent*"[tiab] OR "youth*"[tiab] OR "teen*"[tiab] OR "young adult"[tiab] OR "Infant"[Mesh] OR "infant*"[tiab] OR "pediatric*"[tiab]</p> <p>Filter: English<br/>Filter: Exclude animal studies</p> |
| EMBASE Search      | <p>'fecal microbiota transplantation' AND 'pediatrics'</p> <p>Age<br/>Newborn (0-1 months)<br/>Infant (1-12 months)<br/>Child (1-12 years)</p>                                                                                                                                                                                                                                                                                                                                                                                                                                                                                                                                                                                                                                                                 |

|                       |                                                                                                                                                                                  |
|-----------------------|----------------------------------------------------------------------------------------------------------------------------------------------------------------------------------|
|                       | Preschool child (1-6 years)<br>School child (7-12 years)<br>Adolescent (13-17 years)<br>Young adult (18-24 years)<br><br>Study types<br>Human<br><br>Publication type<br>Article |
| CINAHL Search         | 'fecal microbiota transplantation' AND 'pediatric'                                                                                                                               |
| Cochrane Search       | 'Fecal microbiota transplantation' [Abstract] AND 'Pediatrics' [Abstract]<br>OR 'Children' [Abstract]                                                                            |
| Google Scholar Search | "Fecal microbiota transplantation" AND "Pediatrics"                                                                                                                              |

**Supplemental Table S2: List of studies for which full articles were retrieved and reviewed**

| Author/Year          | Title                                                                                                                                                          | Include/Exclude |
|----------------------|----------------------------------------------------------------------------------------------------------------------------------------------------------------|-----------------|
| Nicholson 2022 [1]   | Efficacy and Outcomes of Faecal Microbiota Transplantation for Recurrent <i>Clostridioides difficile</i> Infection in Children with Inflammatory Bowel Disease | Include         |
| Li 2022 [2]          | Characteristics and management of children with <i>Clostridioides difficile</i> infection at a tertiary pediatric hospital in China                            | Include         |
| Kellermayer 2022 [3] | Fecal Microbiota Transplantation Commonly Failed in Children With Co-Morbidities                                                                               | Include         |
| Aldrich 2019 [4]     | Analysis of Treatment Outcomes for Recurrent <i>Clostridium difficile</i> Infections and Fecal Microbiota Transplantation in a Pediatric Hospital              | Include         |
| Nicholson 2020 [5]   | Efficacy of Fecal Microbiota Transplantation for <i>Clostridium difficile</i> Infection in Children                                                            | Include         |
| Hourigan 2019 [7]    | Fecal Transplant in Children With <i>Clostridioides difficile</i> Gives Sustained Reduction in Antimicrobial Resistance and Potential Pathogen Burden          | Include         |
| Barnes 2018 [9]      | Competitively Selected Donor Fecal Microbiota Transplantation: Butyrate Concentration and Diversity as Measures of Donor Quality                               | Include         |
| Fareed 2018 [10]     | Applying fecal microbiota transplantation (FMT) to treat recurrent <i>Clostridium difficile</i> infections (rCDI) in children                                  | Include         |

|                      |                                                                                                                                                                                                 |         |
|----------------------|-------------------------------------------------------------------------------------------------------------------------------------------------------------------------------------------------|---------|
| Brumbaugh 2018 [26]  | An Intra gastric Fecal Microbiota Transplantation Program for Treatment of Recurrent <i>Clostridium difficile</i> in Children is Efficacious, Safe, and Inexpensive                             | Include |
| Hourigan 2015 [27]   | Microbiome changes associated with sustained eradication of <i>Clostridium difficile</i> after single faecal microbiota transplantation in children with and without inflammatory bowel disease | Include |
| Barfield 2018 [25]   | Going to the Bank: Fecal Microbiota Transplantation in Pediatrics                                                                                                                               | Include |
| Pierog 2014 [28]     | Fecal microbiota transplantation via nasogastric tube for recurrent <i>Clostridium difficile</i> infection in pediatric patients                                                                | Include |
| Kronman 2015 [29]    | Fecal Microbiota Transplantation Via Nasogastric Tube for Recurrent <i>Clostridium difficile</i> Infection in Pediatric Patients                                                                | Include |
| Russell 2014 [30]    | Fecal transplant for recurrent <i>Clostridium difficile</i> infection in children with and without inflammatory bowel disease                                                                   | Include |
| Zhang 2018 [43]      | Safety of fecal microbiota transplantation in Chinese children: A single-center retrospective study                                                                                             | Exclude |
| Li 2018 [44]         | Clinical Efficacy and Microbiome Changes Following Fecal Microbiota Transplantation in Children With Recurrent <i>Clostridium Difficile</i> Infection                                           | Exclude |
| Drewes 2019 [45]     | Transmission and clearance of potential procarcinogenic bacteria during fecal microbiota transplantation for recurrent <i>Clostridioides difficile</i>                                          | Exclude |
| Bluestone 2018 [46]  | Fecal Microbiota Transplantation for Recurrent <i>Clostridium difficile</i> Infections in Pediatric Hematopoietic Stem Cell Transplant Recipients                                               | Exclude |
| Walia 2014 [47]      | Efficacy of fecal microbiota transplantation in 2 children with recurrent <i>Clostridium difficile</i> infection and its impact on their growth and gut microbiome                              | Exclude |
| Ooijselaar 2019 [48] | Faecal transplants for children with recurrent infections                                                                                                                                       | Exclude |

**Supplemental Table S3: Risk of Bias Assessment for Observational Cohort Studies with Newcastle-Ottawa Scale**

[illegible]

|                                                                                  |      |      |      |      |      |      |      |      |      |      |
|----------------------------------------------------------------------------------|------|------|------|------|------|------|------|------|------|------|
| of small number lost)                                                            |      |      |      |      |      |      |      |      | *    | *    |
| <b>Total number of *</b>                                                         | 8    | 8    | 7    | 9    | 8    | 7    | 8    | 8    | 8    | 8    |
| <b>Score 7-9 high quality, 4-6 moderate risk of bias, 0-3 high risk of bias.</b> | High |

**Supplemental Table 4: Risk of Bias Assessment for Case Series with NIH quality assessment tool**

| <b>Author/Year</b>                                                                                                         | <b>Barfield<br/>2018 [25]</b> | <b>Pierog<br/>2014 [28]</b> | <b>Kronman<br/>2015 [29]</b> | <b>Russell<br/>2014 [30]</b> |
|----------------------------------------------------------------------------------------------------------------------------|-------------------------------|-----------------------------|------------------------------|------------------------------|
| 1. Was the study question or objective clearly stated?                                                                     | yes                           | yes                         | yes                          | Yes                          |
| 2. Was the study population clearly and fully described, including a case definition?                                      | yes                           | yes                         | yes                          | Yes                          |
| 3. Were the cases consecutive?                                                                                             | yes                           | no                          | yes                          | Yes                          |
| 4. Were the subjects comparable?                                                                                           | yes                           | yes                         | yes                          | Yes                          |
| 5. Was the intervention clearly described?                                                                                 | yes                           | yes                         | yes                          | Yes                          |
| 6. Were the outcome measures clearly defined, valid, reliable, and implemented consistently across all study participants? | yes                           | yes                         | yes                          | No                           |
| 7. Was the length of follow-up adequate?                                                                                   | Yes                           | yes                         | yes                          | Yes                          |
| 8. Were the statistical methods well-described?                                                                            | yes                           | no                          | No                           | No                           |
| 9. Were the results well-described?                                                                                        | Yes                           | yes                         | yes                          | Yes                          |
| <b>Total quality (total number of Yes)</b>                                                                                 | 9                             | 7                           | 8                            | 7                            |
| <b>Quality (7-9 yes: Good; 4-6 yes: Fair; 1-3 yes: Poor)</b>                                                               | Good                          | good                        | good                         | Good                         |
